CORRECTION

# Correction: Mapping career patterns in research: A sequence analysis of career histories of ERC applicants

The *PLOS ONE* Staff

There is an error in the order of author affiliations. The publisher apologizes for the error. The correct order is:

Claartje J. Vinkenburg<sup>2\*</sup>, Sara Connolly<sup>3‡</sup>, Stefan Fuchs<sup>1‡</sup>, Channah Herschberg<sup>4‡</sup>, Brigitte Schels<sup>1,5‡</sup>

**1** Institute for Employment Research, IAB, Nuremberg, Germany, **2** Independent expert, Amsterdam, the Netherlands, affiliated with VU Amsterdam, **3** Norwich Business School, University of East Anglia, Norwich, United Kingdom, **4** Institute for Management Research, Radboud University, Nijmegen, the Netherlands, **5** Friedrich-Alexander University of Erlangen-Nuremberg, Nuremberg, Germany

\* Corresponding author

‡ Corresponding author is principal investigator, all other authors appear in alphabetical order, and made equal contributions to data collection, data analysis, and writing

## Reference

1. Vinkenburg CJ, Connolly S, Fuchs S, Herschberg C, Schels B (2020) Mapping career patterns in research: A sequence analysis of career histories of ERC applicants. *PLoS ONE* 15(7): e0236252. <https://doi.org/10.1371/journal.pone.0236252> PMID: 32726338

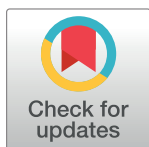

## OPEN ACCESS

**Citation:** The *PLOS ONE* Staff (2021) Correction: Mapping career patterns in research: A sequence analysis of career histories of ERC applicants. *PLoS ONE* 16(6): e0253832. <https://doi.org/10.1371/journal.pone.0253832>

**Published:** June 22, 2021

**Copyright:** © 2021 The PLOS ONE Staff. This is an open access article distributed under the terms of the [Creative Commons Attribution License](https://creativecommons.org/licenses/by/4.0/), which permits unrestricted use, distribution, and reproduction in any medium, provided the original author and source are credited.
